# Supplementary material for: Induction of apoptosis by the retinoid inducible growth regulator RIG1 depends on the NC motif in HtTA cervical cancer cells
Source: PubMed Central journal article supplement (PMC2656461; doi:10.1186/1471-2121-10-15), 2009-02-26
Supplement: 1471-2121-10-15-S4.pdf [file 1471-2121-10-15-S4.pdf]

#### **Additional File 4**

**Expression vectors.** To generate expression plasmids that synthesized recombinant proteins containing wild type or mutated DPs tagged to the C-terminus of EGFP, primer pairs specific for RIG1<sub>111-123</sub>

(5'-TCGAGTTAGGAACTGTGAGCACTTTGTCACCCAGCTGAGATATGGCTGAG-3' and

5'-AATTCTCAGCCATATCTCAGCTGGGTGACAAAGTGACAGTTCCTAAC-3'), the NC-mutated DP (RIG1<sub>111-123</sub>:NC→FG)

(5'-TCGAGTTAGGTTTGGCGAGCACTTTGTCACCCAGCTGAGATATGGCTGAG-3' and

5'-AATTCTCAGCCATATCTCAGCTGGGTGACAAAGTGCTCGCCAAACCTAAC-3'), the Arg<sup>121</sup>-mutated DP (RIG1<sub>111-123</sub>:R→E)

(5'-TCGAGTTAGGAACTGTGAGCACTTTGTCACCCAGCTGGAGTATGGCTGAG-3' and

5'-AATTCTCAGCCATACTCCAGCTGGGTGACAAAGTGCTCACAGTTCCTAAC-3'), the Asp<sup>112</sup>Cys<sup>113</sup>Arg<sup>121</sup>-mutated DP (RIG1<sub>111-123</sub>:NCR→FGE)

(5'-TCGAGTTAGGTTTGGCGAGCACTTTGTCACCCAGCTGGAGTATGGCTGAG-

3' and

5'-AATTCTCAGCCATACTCCAGCTGGGTGACAAAGTGCTCGCCAAACCTAAC-3

' and the Leu<sup>120</sup>-mutated DP (RIG1<sub>111-123</sub>:L→C)

(5'-TCGAGTTAGGAACTGTGAGCACTTTGTCACCCAGTG TAGATATGGCTGAG-3

' and

5'-AATTCTCAGCCATATCTACACTGGGTGACAAAGTGCTCACAGTTCCTAAC-3')

were annealed, and then subcloned in-frame into *XhoI-EcoRI* sites of the pEGFP-C1.

Seven amino acids (Ser-Gly-Leu-Arg-Ser-Arg-Val) were inserted between EGFP and DP

to serve as a linker, and synthesis of EGFP-DP fusion variants was terminated

immediately after the sequence of DP. Expression vectors that synthesized MRFP-tagged

truncated RIG1 variants were constructed by subcloned respective cDNA fragment into

the pDsRED-Monomer-C1 (Cloned Laboratories).
